# Supplementary material
Source: PubMed Central journal article supplement (PMC8820466)
Supplement: NIHMS1759623-supplement-Supplementary_Information.pdf [file NIHMS1759623-supplement-Supplementary_Information.pdf]

## Supplementary Information

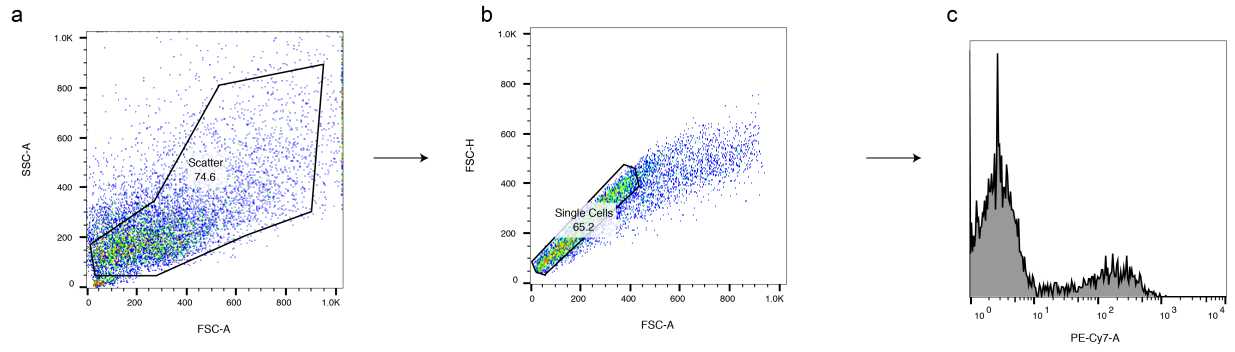

**Supplemental Figure 1: Flow cytometry gating strategy, associated with Fig. 1**
