# Supplementary material
Source: PubMed Central journal article supplement (PMC8820466)

sgRNA

MW none ACE2 BRD2 CD33

Probe: ACE2, GAPDH

150

75

37

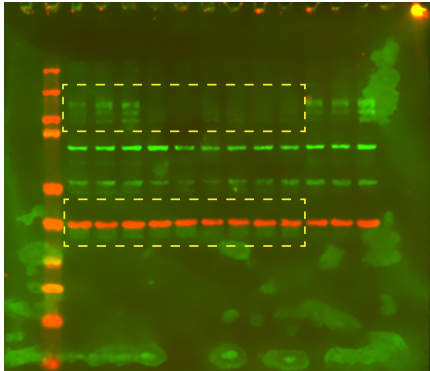

Probe: BRD2

150

75

37

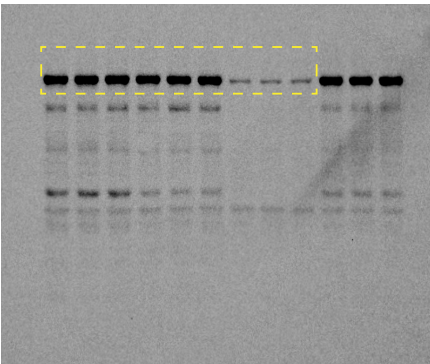

Supplement: NIHMS1759623-supplement-Unmodified_Gels_Extended_Data_Figure_4.pdf [file NIHMS1759623-supplement-Unmodified_Gels_Extended_Data_Figure_4.pdf]

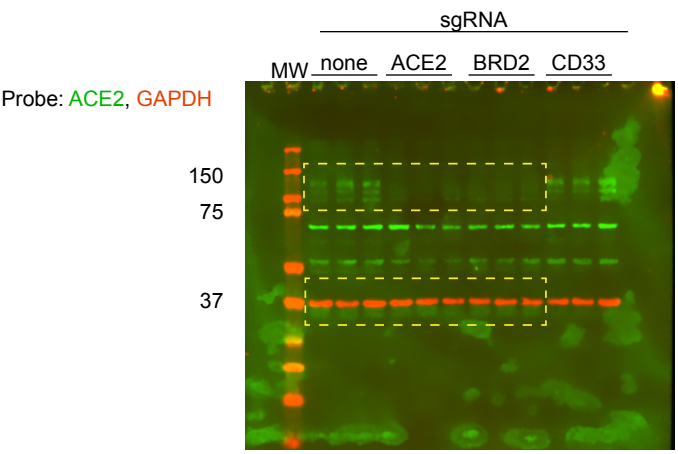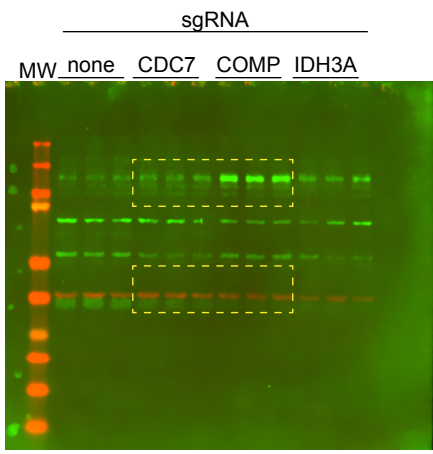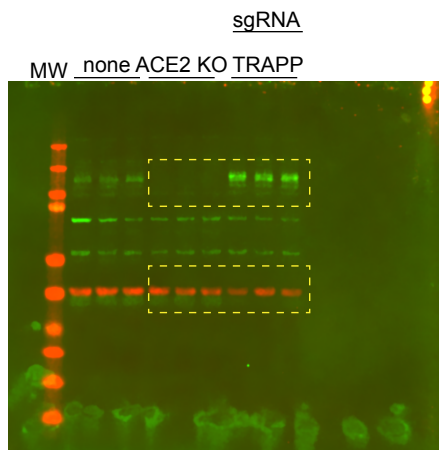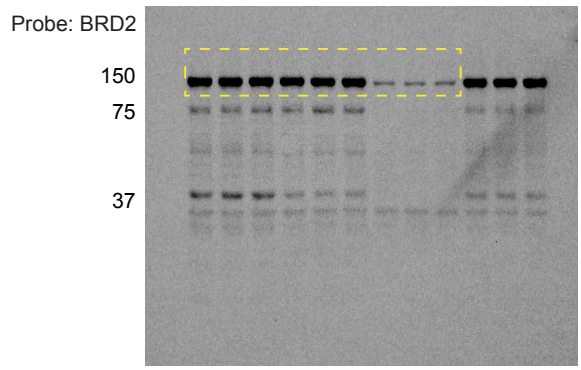

Supplement: NIHMS1759623-supplement-Unmodified_Gels_Figure_3.pdf [file NIHMS1759623-supplement-Unmodified_Gels_Figure_3.pdf]
